# Supplementary material
Source: PubMed Central journal article supplement (PMC6202234)

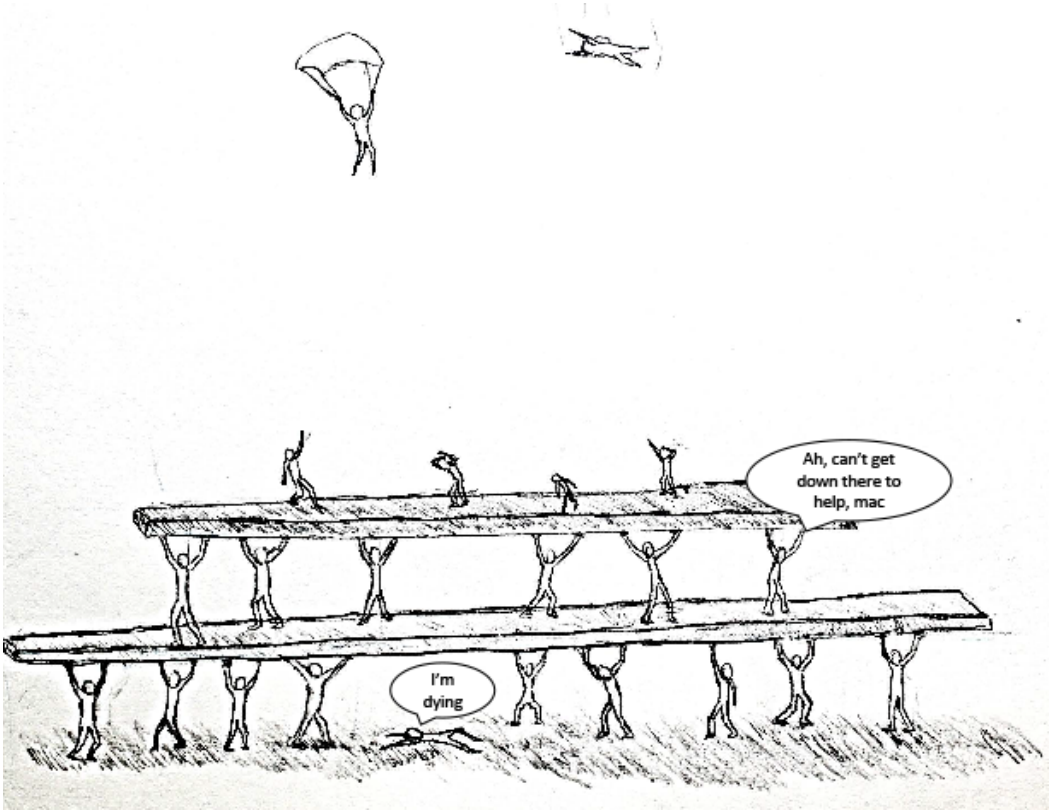

Supplement: NIHMS971952-supplement-Graphic_Abstract.pdf [file NIHMS971952-supplement-Graphic_Abstract.pdf]
